# Supplementary material for: Antagonizing somatostatin receptor subtype 2 and 5 reduces blood glucose in a gut- and GLP-1R-dependent manner
Source: JCI journal article supplement (doi:10.1172/jci.insight.143228), 2021-01-12
Supplement: sd1 [file 1]

## Supplementary figures

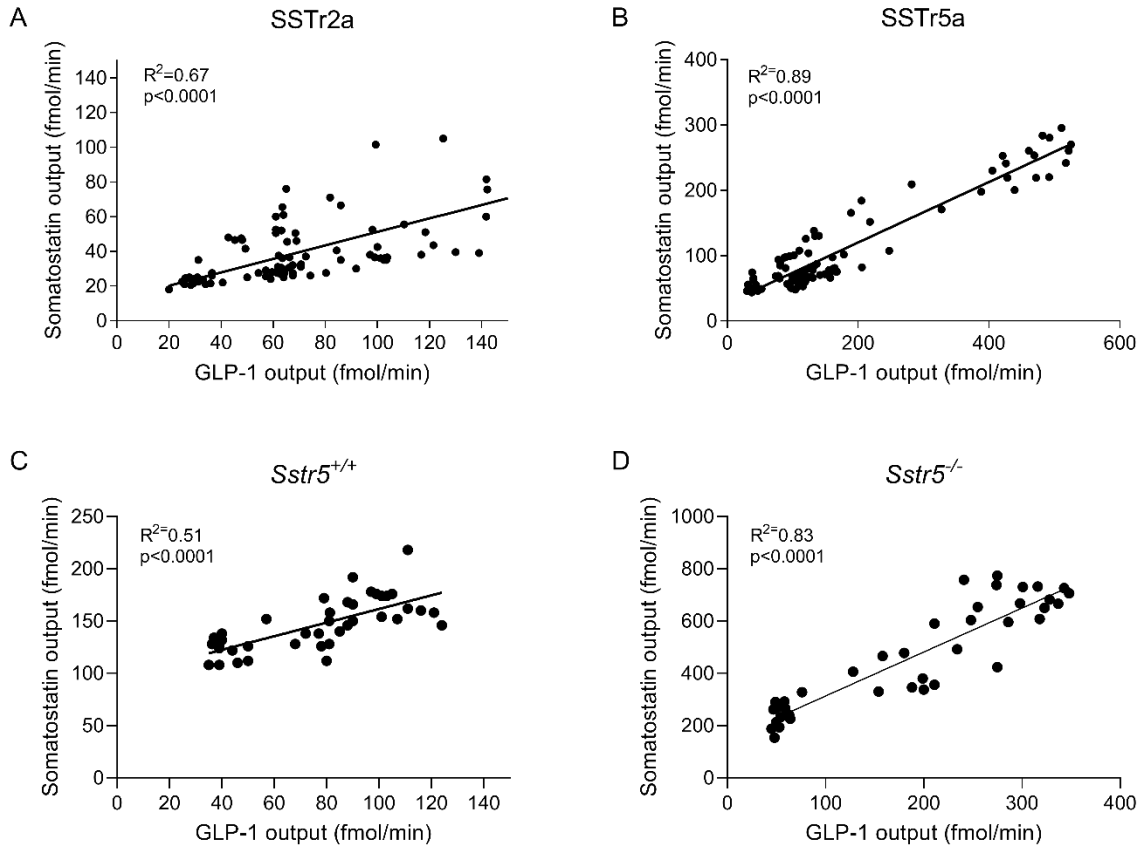

**Supplementary fig. S1 correlation analysis between somatostatin and GLP-1 output.** Correlation analysis are based on average output each minute from somatostatin and GLP-1 during the perfusion of the proximal small intestine. A) Average output each minute from 1-100 min in C57BL/6JRj mice of somatostatin and GLP-1 output in perfusion experiments where glucose or glucose + SSTR2a was given (shown in Fig. 1A-D). GLP-1 average of n=8, SS based on n=5. B) Same as A, but for SSTR5a infusion, average of n=6 for both hormones (shown in fig 1 E-H). C) Average output each minute from 1-40 min in *Sstr5*<sup>-/-</sup> of GLP-1 and somatostatin n=5 for both hormones (shown in fig. 1 I-K). D) Same as C, but in *Sstr*<sup>-/-</sup> mice, n=5 for both hormones (shown in fig. 1 I-K).

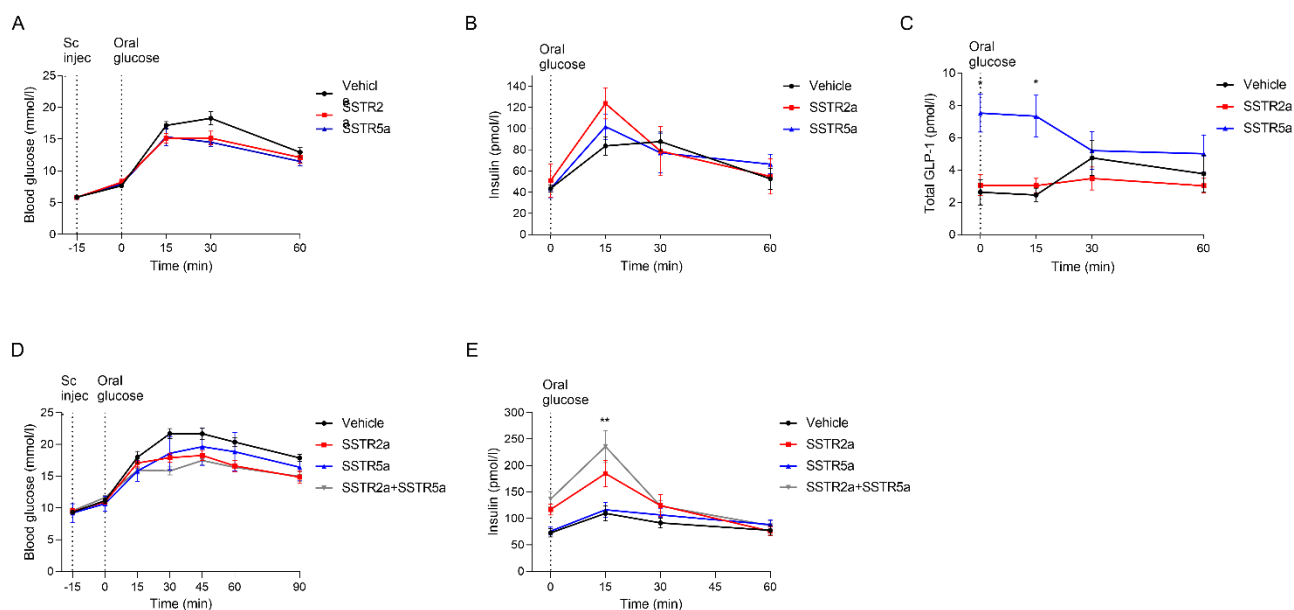

**Supplementary fig. S2. SSTR2a and SSTR5a decrease blood glucose *in vivo* in female mice and combining the antagonists in male mice further improves glucose tolerance.** Female mice received vehicle (black), 4 mg/kg SSTR2a (red) or SSTR5a (blue) by sc injection 15 minutes before an oral glucose load. A) Plasma blood glucose levels (mmol/l), n=8. B) Plasma insulin levels (pmol/l), n=8. C) Total GLP-1 plasma levels (pmol/l), n=8. D) Male mice received vehicle (black), 4 mg/kg SSTR2a (red), SSTR5a (blue) or SSTR2a+ SSTR5a in combination (grey) by sc injection 15 minutes before an oral glucose load. D) Plasma blood glucose levels (mmol/l), n=12. E) Plasma insulin levels (pmol/l), n=12. Data are presented as mean  $\pm$  SEM. Significance at specific time points was assessed by two-way ANOVA followed by Tukey post hoc analysis to correct for multiple testing.

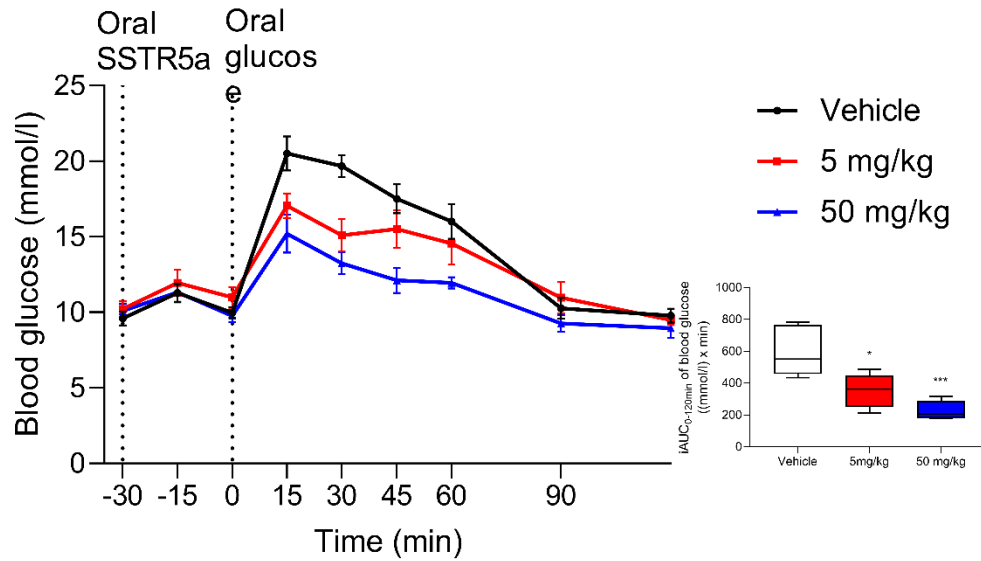

**Supplementary fig. S3. Oral gavage of SSTR5a decrease blood glucose in a dose dependent**

**manner.** Male mice received vehicle (black), 5 mg/kg SSTR5a (red) or 50 mg/kg SSTR5a (blue) by oral gavage 30 minutes before an oral glucose load. Data are presented as mean  $\pm$  SEM, n=5-6.

Statistical significance was based on iAUC from 0-120 min and tested by one-way ANOVA followed by the Tukey post hoc analysis to correct for multiple testing, \* $p < 0.05$ , \*\*\* $p < 0.001$ . The box plots show the median and 25th and 75th percentiles, and the whiskers represent the smallest and highest value.

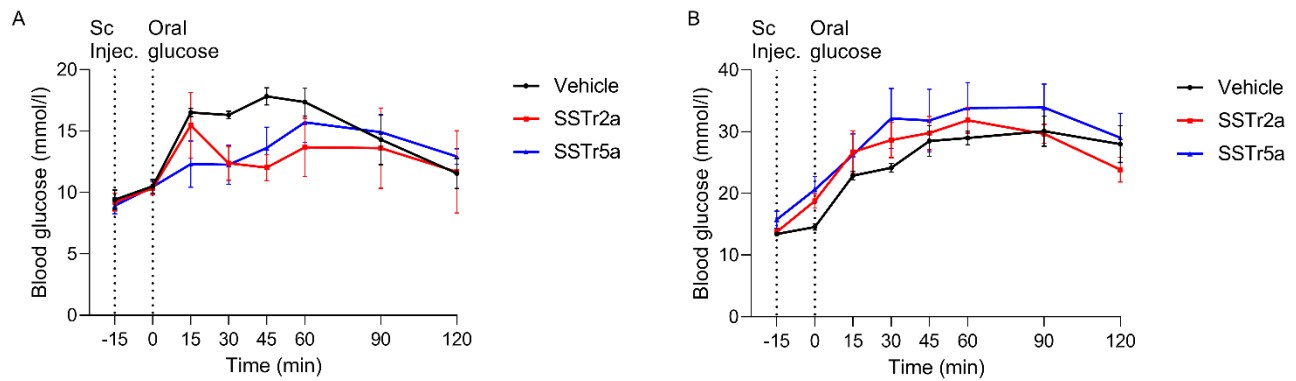

**Supplementary fig. S4. Sc injection of SSTR2a and SSTR5a lowers blood glucose in control mice but have no effect in DIO mice.** Control and DIO mice received sc administration of vehicle (black), 8 mg/kg SSTR2a (red) or SSTR5a (blue) 15 min before oral glucose. A) Plasma blood glucose levels (mmol/l) in control mice, n=4 B) Plasma blood glucose levels (mmol/l) in DIO mice, n=5-6. Data are presented as means  $\pm$  SEM.
